# Supplementary material for: Effect of chalcogens on CO insertion into the palladium–methyl bond of [(N^N^X)Pd(CH3)]+ (X = O, S, Se) and on CO/ethylene copolymerisation
Source: Royal Society of Chemistry journal article supplement (doi:10.1039/c5dt03929k), 2015-01-01
Supplement: c5dt03929k1.pdf [file c5dt03929k1.pdf]

**Effect of chalcogens on CO insertion into the palladium-methyl bond of  
[(N<sup>^</sup>N<sup>^</sup>X)Pd(CH<sub>3</sub>)]<sup>+</sup> (X = O, S, Se) and on CO/ethylene copolymerisation**

Kamlesh Kumar and James Darkwa\*

Department of Chemistry, University of Johannesburg, Auckland Park Kingsway Campus,

Auckland Park 2006, South Africa; email: [jdarkwa@uj.ac.za](mailto:jdarkwa@uj.ac.za)

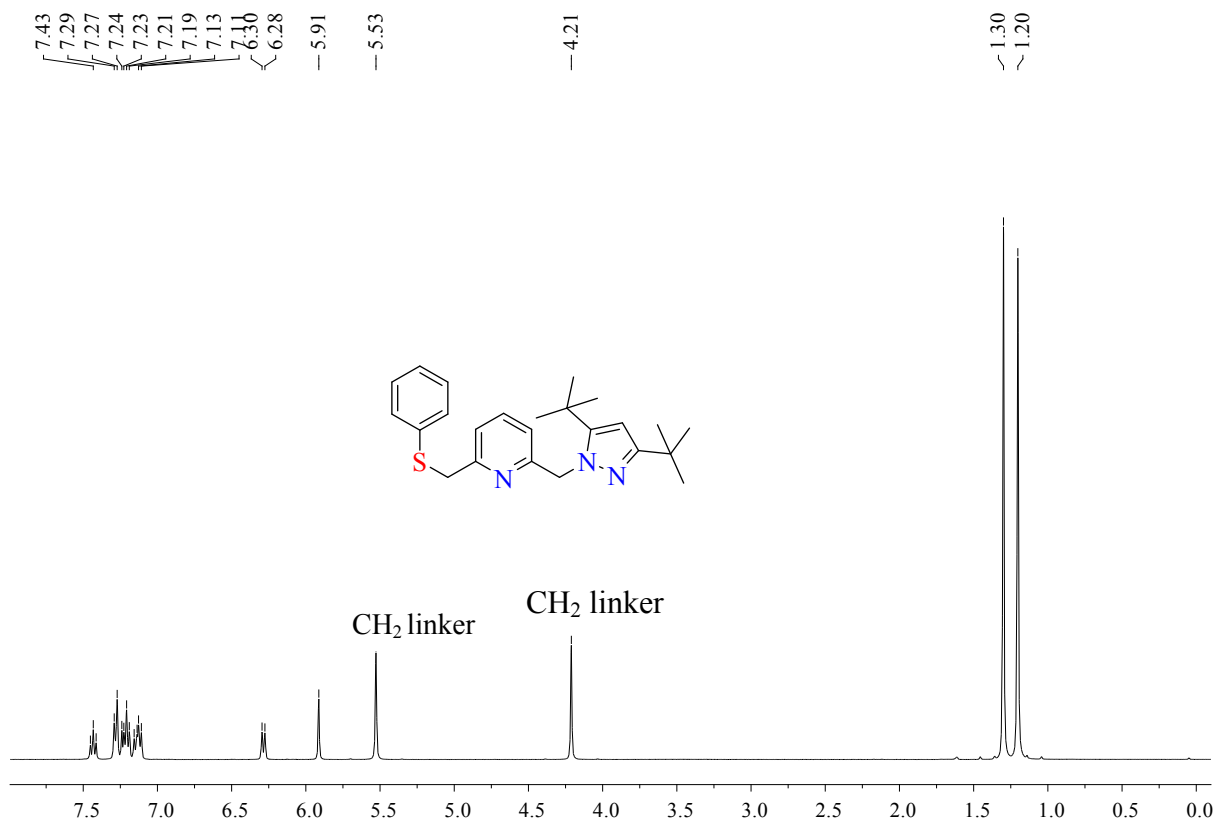

Figure S1: <sup>1</sup>H NMR spectrum of L1

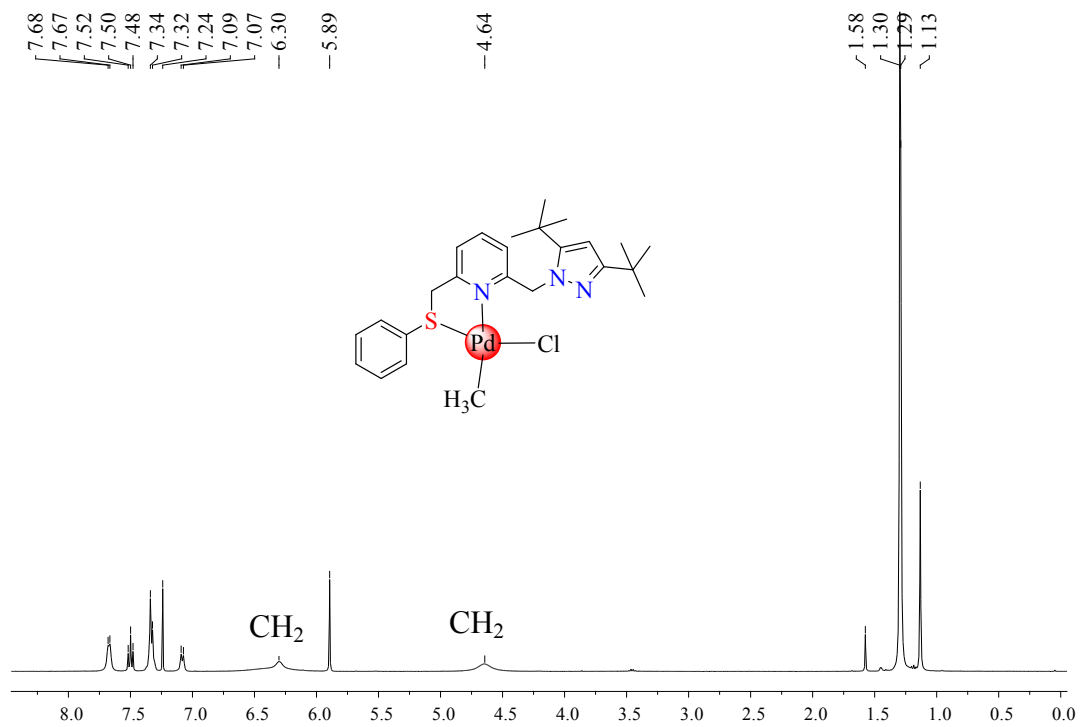

Figure S2: <sup>1</sup>H NMR spectrum of **1a**

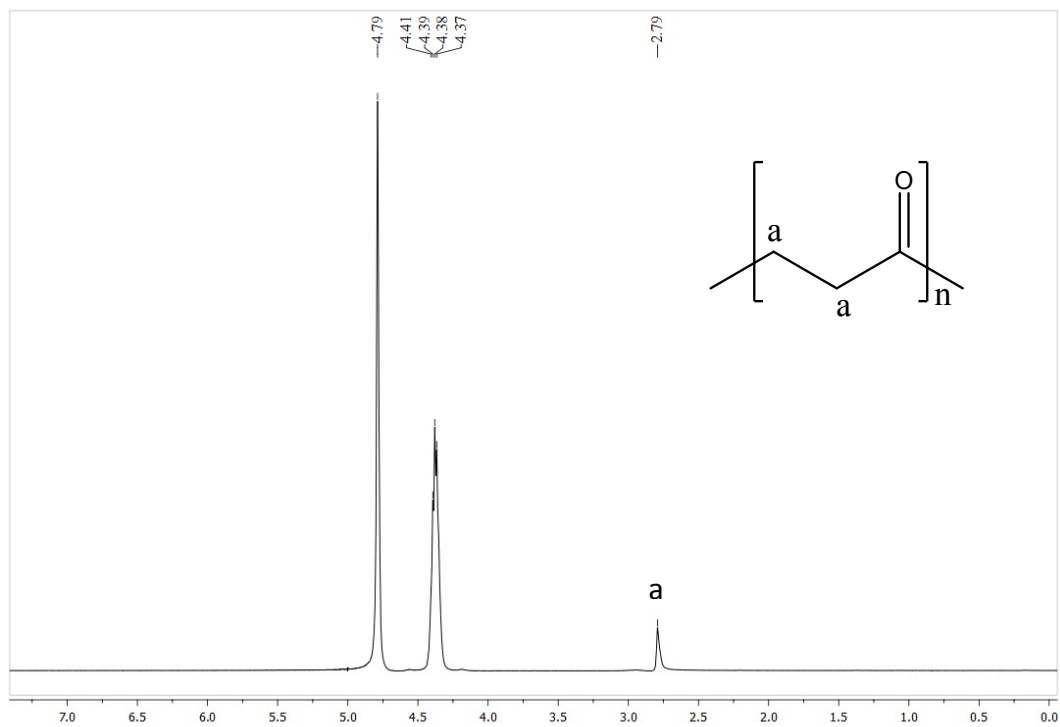

Figure S3: <sup>1</sup>H NMR spectrum of CO/ethylene copolymer in HFIP

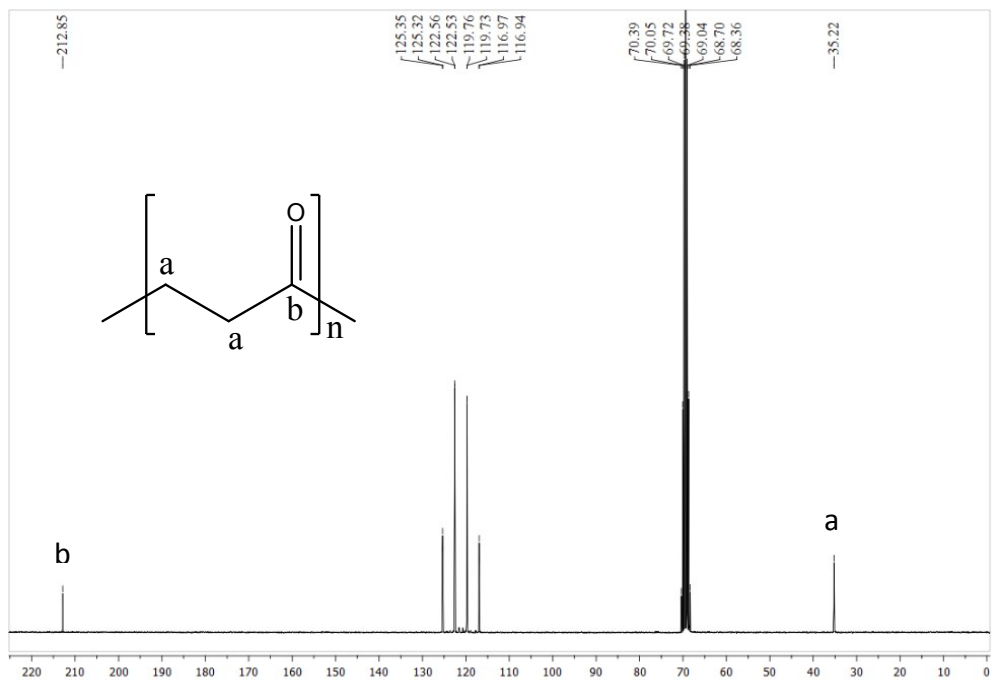

Figure S4:  $^{13}\text{C}\{^1\text{H}\}$  NMR spectrum of CO/ethylene copolymer in HFIP

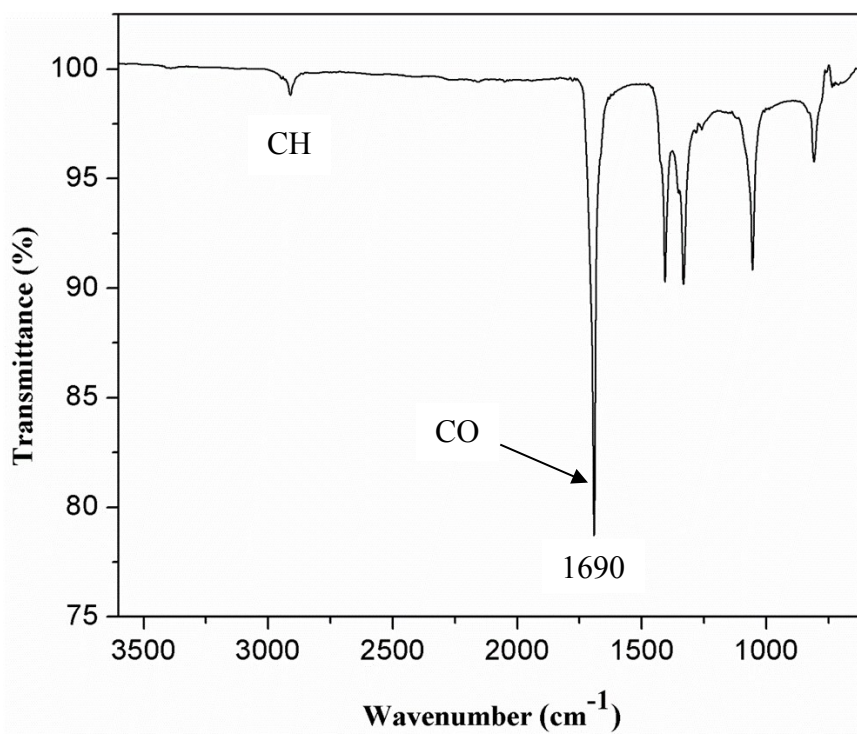

Figure S5: FT-IR spectrum of CO/ethylene copolymer

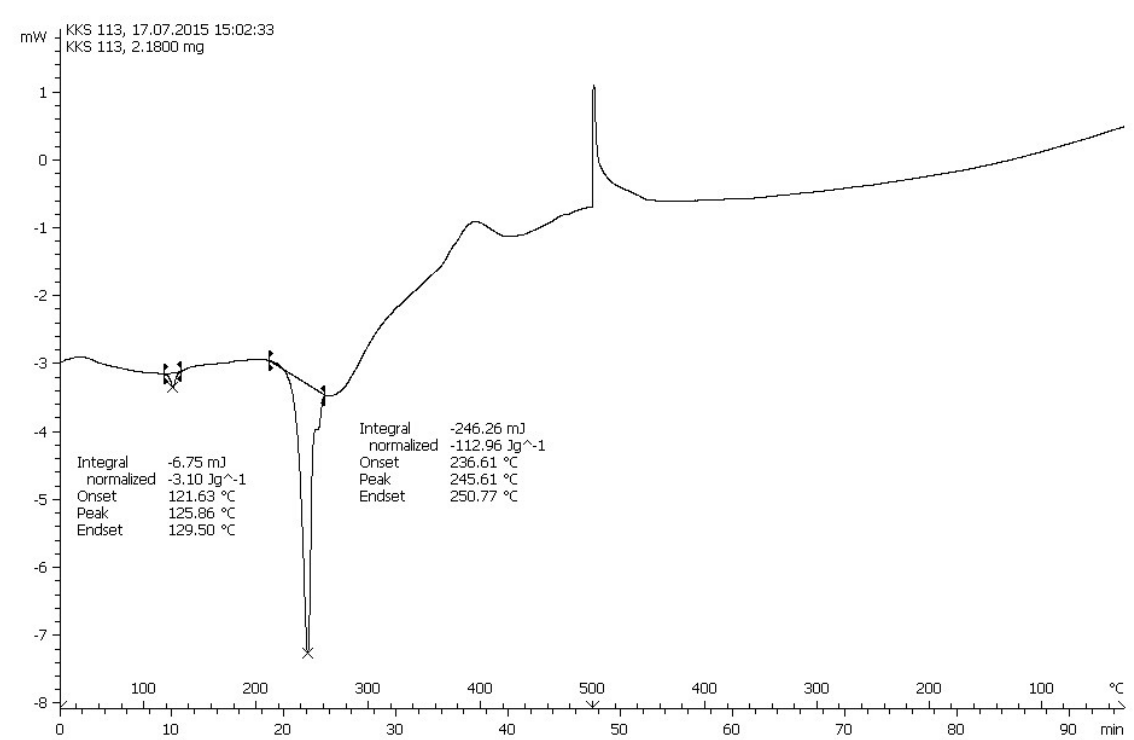

Figure S6: DSC thermogram of CO/ethylene copolymer

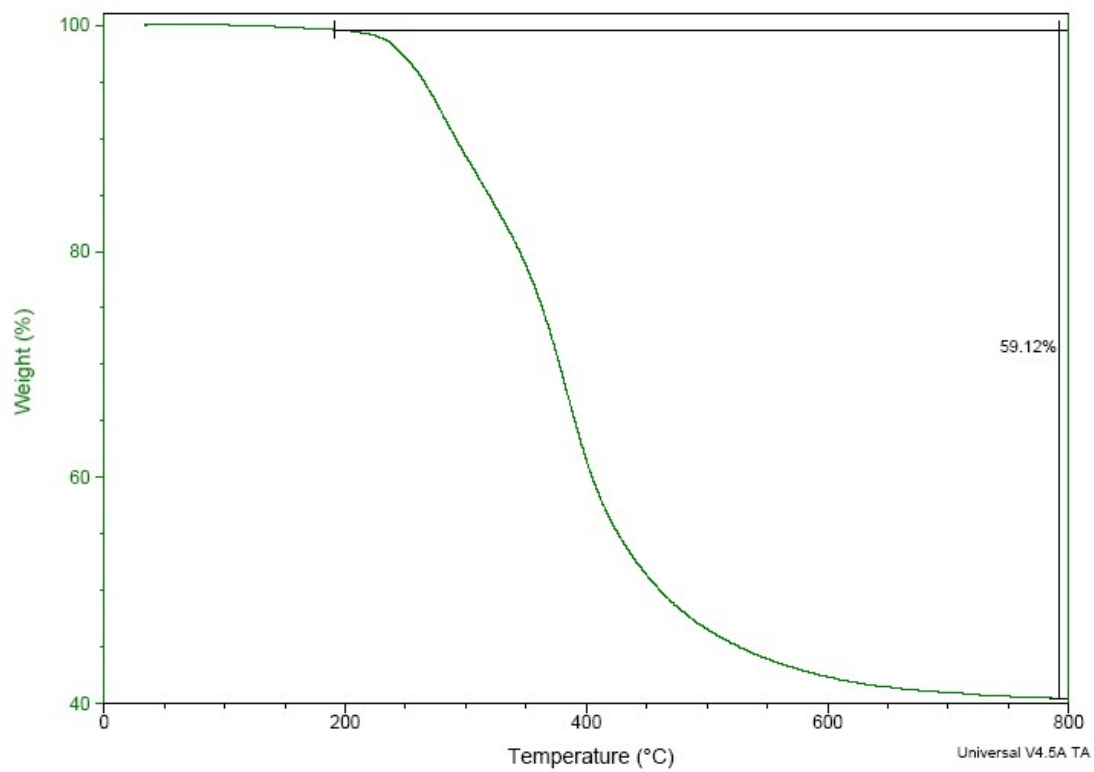

Figure S7: TGA thermogram of CO/ethylene copolymer

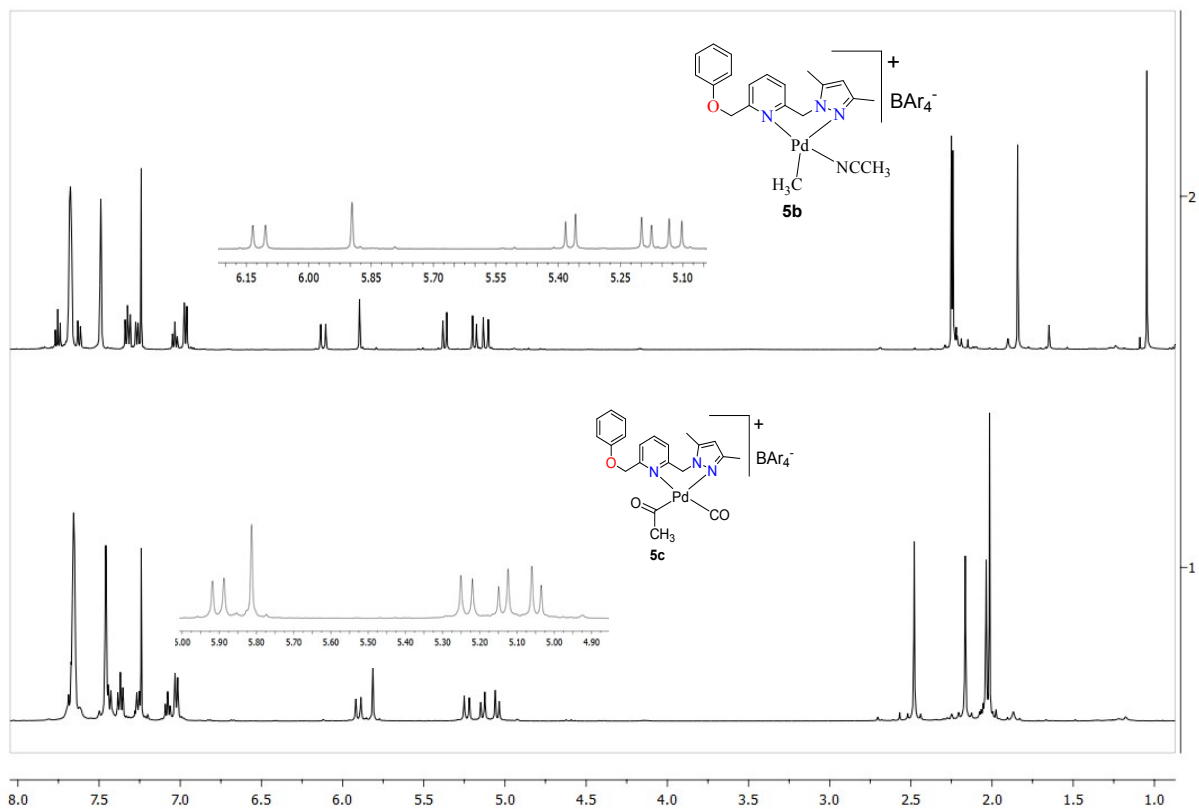

Figure S8: <sup>1</sup>H NMR spectra of complexes **5b** and **5c**

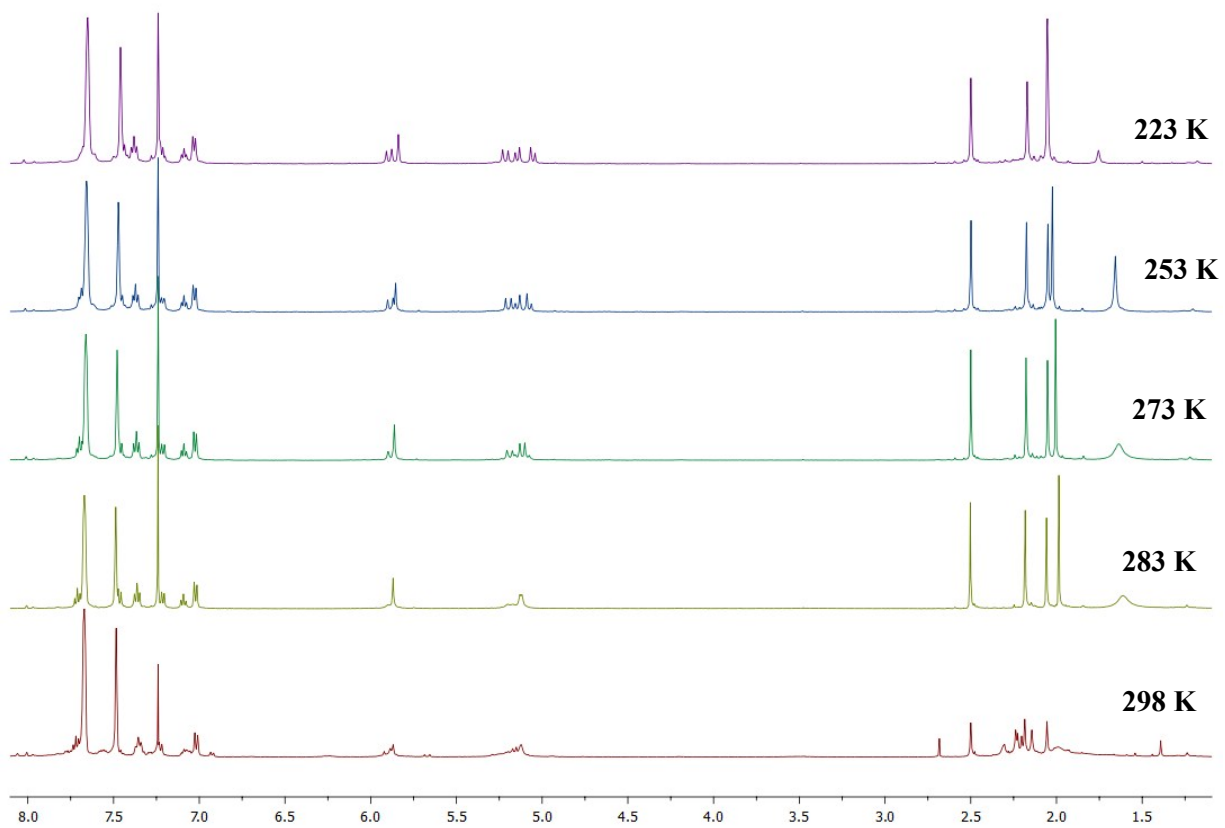

Figure S9: Variable temperature  $^1\text{H}$  NMR of complex **5c**

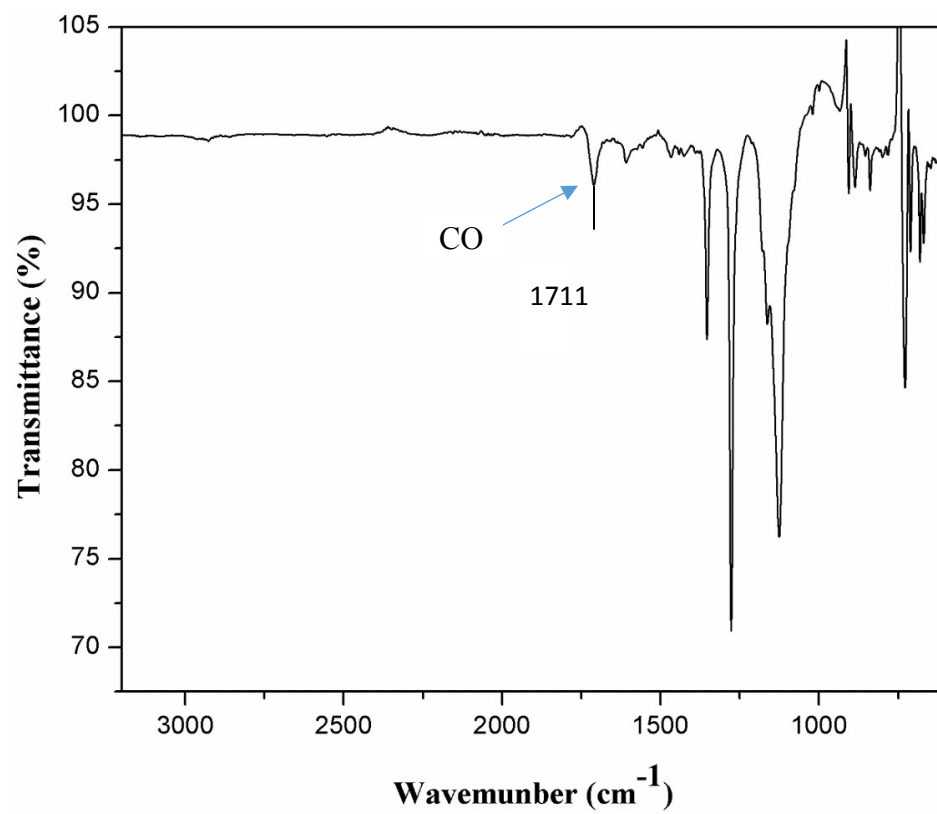

Figure S10: FT-IR spectrum of **1c**
